# Supplementary material
Source: Springer Nature journal article supplement (https://www.springermedizin.de/resource/supplementary/13014_2012_750_MOESM5_ESM.pdf/9634002)

**A****Time course of G2/M phase distribution**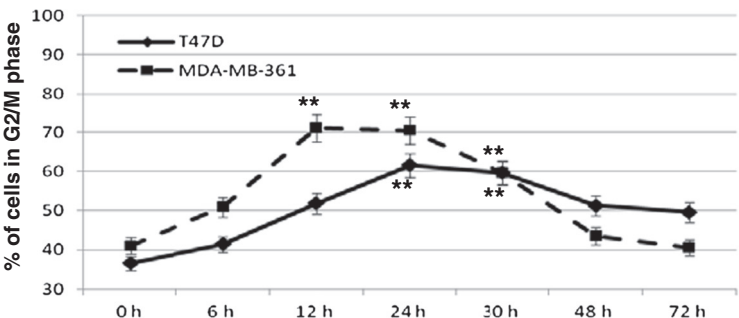**B****Time course of G1/S phase distribution**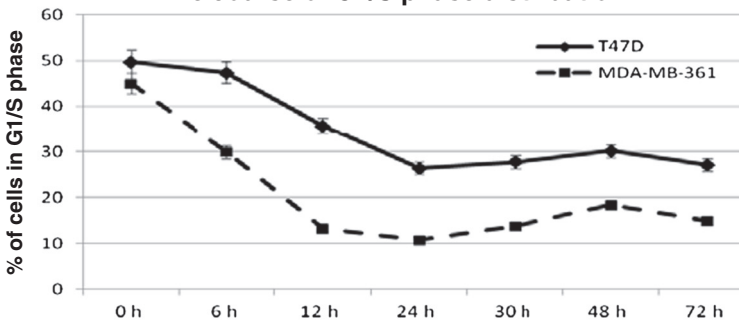**C****Time course of SubG1 phase distribution**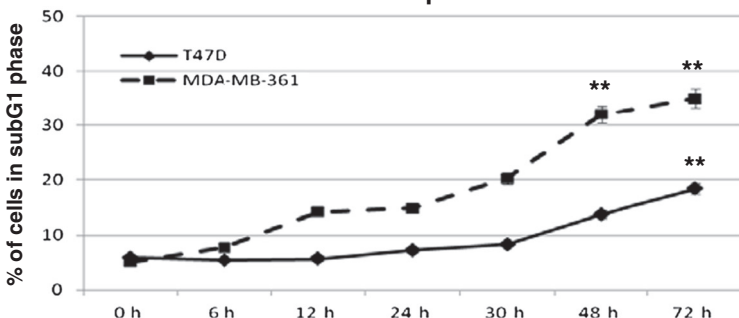

Supplement: MOESM5 [file 9634002]
